# Supplementary material for: Factors Associated with Axillary Lymph Node Status in Clinically Node-Negative Breast Cancer Patients Undergoing Neoadjuvant Chemotherapy
Source: MDPI journal article supplement (doi:10.3390/cancers14184451), 2022-09-14
Supplement: s1 [file s1]

**Table S1.** Clinical and tumor characteristics of the patients with breast non-pCR after NAC.

| Variable                           | No. of cases | %    |
|------------------------------------|--------------|------|
| Age (years), median (IQR)          |              |      |
| <40                                | 24           | 18.2 |
| 40-55                              | 84           | 63.6 |
| >55                                | 24           | 18.2 |
| Tumor size (cm), median (IQR)      | 3.3 (1.5)    |      |
| Tumor histology                    |              |      |
| IDC                                | 123          | 93.2 |
| Others                             | 9            | 6.8  |
| Clinical T category <sup>a</sup>   |              |      |
| T1                                 | 9            | 6.8  |
| T2                                 | 110          | 83.4 |
| T3                                 | 13           | 9.8  |
| SBR Grade <sup>b</sup>             |              |      |
| 1                                  | 31           | 23.5 |
| 2                                  | 66           | 50.0 |
| 3                                  | 35           | 26.5 |
| Biologic subtype                   |              |      |
| HR-positive/HER2-negative          | 71           | 53.8 |
| HR-positive/HER2-positive          | 27           | 20.5 |
| HR-negative/HER2-positive          | 12           | 9.0  |
| HR-negative/HER2-negative          | 22           | 16.7 |
| Ki-67                              |              |      |
| <20                                | 53           | 40.2 |
| ≥20                                | 65           | 49.2 |
| Unknown                            | 14           | 10.6 |
| Breast surgery type                |              |      |
| Mastectomy                         | 33           | 25.0 |
| Breast-conserving surgery          | 99           | 75.0 |
| Lymphovascular invasion            |              |      |
| Present                            | 18           | 13.6 |
| Absent                             | 114          | 86.4 |
| Pathological node status after NAC |              |      |

|                               |     |      |
|-------------------------------|-----|------|
| ypN <sup>+</sup> <sup>c</sup> | 17  | 12.9 |
| ypN0 <sup>d</sup>             | 115 | 87.1 |

Abbreviations: pCR, pathologic complete response; NAC, neoadjuvant chemotherapy; IQR, inter-quartile range; IDC, invasive ductal carcinoma; HR, hormone receptor; HER2, human epidermal growth factor receptor 2. Figures are numbers with percentages in parentheses, unless otherwise stated.<sup>a</sup> T stage was defined according to the American Joint Committee on Cancer TNM classification. <sup>b</sup> Scarff Bloom Richardson grading system modified by Elston & Ellis. <sup>c</sup> ypN<sup>+</sup> was defined as any tumor cells in the axillary lymph nodes after NAC, including isolated tumor cells ( $\leq 0.2$  mm), micrometastases ( $> 0.2$  mm and  $\leq 2$  mm), or macrometastasis ( $> 2$  mm). <sup>d</sup> ypN0 was defined as the absence of tumor cells in the axillary lymph nodes after NAC.

**Table S2.** Summary of clinical and pathologic features of patients with recurrent disease.

| Age (years) | Tumor histology | Tumor size (cm) | SBR grade | Biologic subtype              | Breast surgery type | LVI     | Pathological status after NAC | Time interval from diagnosis to recurrence (months) | Recurrences site                            |
|-------------|-----------------|-----------------|-----------|-------------------------------|---------------------|---------|-------------------------------|-----------------------------------------------------|---------------------------------------------|
| 32          | IDC             | 2.6             | 2         | HR-positive/<br>HER2-negative | BCS                 | Present | ypT2N1miM0                    | 53                                                  | Ipsilateral Rotter's LNs                    |
| 51          | IDC             | 4.0             | 2         | HR-positive/<br>HER2-negative | Mast.               | Present | ypT1micN1M0                   | 882                                                 | Ipsilateral neck LNs                        |
| 47          | IDC             | 3.0             | 1         | HR-positive/<br>HER2-negative | BCS                 | Absent  | ypT1cN0M0                     | 89                                                  | Liver                                       |
| 43          | IDC             | 4.5             | 2         | HR-positive/<br>HER2-negative | Mast.               | Absent  | ypT2N0M0                      | 60                                                  | Bone                                        |
| 52          | IDC             | 2.1             | 2         | HR-positive/<br>HER2-negative | BCS                 | Absent  | ypT1bN0M0                     | 87                                                  | Para-aortic LNs                             |
| 43          | IDC             | 4.8             | 2         | HR-negative/<br>HER2-negative | BCS                 | Present | ypT2N0M0                      | 41                                                  | Liver                                       |
| 43          | IDC             | 2.4             | 2         | HR-positive/<br>HER2-positive | BCS                 | Absent  | ypT1cN0M0                     | 33                                                  | Lung, liver, bone, ipsilateral axillary LNs |
| 35          | IDC             | 3.4             | 2         | HR-negative/<br>HER2-positive | BCS                 | Absent  | ypT1cN0M0                     | 38                                                  | Liver                                       |
| 47          | IDC             | 3.5             | 2         | HR-positive/<br>HER2-negative | BCS                 | Absent  | ypT1cN0M0                     | 39                                                  | IBTR                                        |
| 39          | IDC             | 4.5             | 2         | HR-positive/<br>HER2-positive | BCS                 | Absent  | ypT2N0M0                      | 36                                                  | IBTR                                        |

Abbreviations: LVI, lymphovascular invasion; NAC, neoadjuvant chemotherapy; IDC, invasive ductal carcinoma; HR, hormone receptor; HER2, human epidermal growth factor receptor 2; BCS, breast-conserving surgery; Mast., mastectomy; LNs, lymph nodes; IBTR, ipsilateral breast tumor recurrence.

**Table S3.** Baseline characteristics of studies included in this meta-analysis of breast pCR and ypN0<sup>a</sup>.

| Study                   | Location    | Sample size | Clinical stage | Classification of biologic subtype                                                                               |
|-------------------------|-------------|-------------|----------------|------------------------------------------------------------------------------------------------------------------|
| Tadros et al.,2017 [26] | USA         | 290         | cT1-2N0        | HER2-positive<br>HR-negative/HER2-negative                                                                       |
| Barron et al.,2018 [27] | USA         | 18093       | cT1-2N0        | HR-positive/HER2-negative<br>HR-positive/HER2-positive<br>HR-negative/HER2-positive<br>HR-negative/HER2-negative |
| Choi et al.,2019 [36]   | Korea       | 200         | cT1-3N0        | HR-positive/HER2-negative<br>HR-positive/HER2-positive<br>HR-negative/HER2-positive<br>HR-negative/HER2-negative |
| Samiei et al.,2020 [37] | Netherlands | 1674        | cT1-3N0        | ER-positive/HER2-negative ER-positive/HER2-positive<br>ER-negative/HER2-positive<br>ER-negative/HER2-negative    |
| Ryu et al.,2022 [38]    | Korea       | 1390        | cT1-3N0        | HR-positive/HER2-negative<br>HR-positive/HER2-positive<br>HR-negative/HER2-positive<br>HR-negative/HER2-negative |
| Yu et al.,2022          | Taiwan      | 222         | cT1-3N0        | HR-positive/HER2-negative<br>HR-positive/HER2-positive<br>HR-negative/HER2-positive<br>HR-negative/HER2-negative |

Abbreviations: pCR, pathologic complete response; HER2, human epidermal growth factor receptor 2; HR, hormone receptor; ER, estrogen receptor. <sup>a</sup> ypN0 was defined as the absence of tumor cells in the axillary lymph nodes after neoadjuvant chemotherapy.

**Table S4.** Using breast pCR as a diagnostic test in different biological subtypes for identifying ypN0 in cN0 breast cancer patients undergoing NAC after summing the results of studies included in the meta-analysis.

|                           | Prevalence of ypN0  | Sensitivity       | Secificity         |
|---------------------------|---------------------|-------------------|--------------------|
| HR-positive/HER2-negative | 71.7% (4872/6793)   | 96.3% (827/859)   | 31.8% (1889/5934)  |
| HR-positive/HER2-positive | 87.9% (4565/5194)   | 97.9% (1905/1946) | 18.1% (588/3248)   |
| HR-negative/HER2-positive | 94.6% (2353/2487)   | 99.1%(1461/1474)  | 11.9% (121/1013)   |
| HR-negative/HER2-negative | 90.4% (6567/7263)   | 98.5%(40/2585)    | 14.0% (656/4678)   |
| All patients              | 84.5% (18488/21869) | 98.2%(6790/6916)  | 21.8% (3255/14953) |

Abbreviations: pCR, pathologic complete response; cN0, clinically node-negative; NAC, neoadjuvant chemotherapy. <sup>a</sup> ypN0 was defined as the absence of tumor cells in the axillary lymph nodes after neoadjuvant chemotherapy.
